# Supplementary material for: miR-27a-5p Attenuates Hypoxia-induced Rat Cardiomyocyte Injury by Inhibiting Atg7
Source: PubMed Central journal article supplement (PMC6566783; doi:10.3390/ijms20102418), 2019-05-16
Supplement: ijms-20-02418-s001.pdf [file ijms-20-02418-s001.pdf]

**Table S1.** Overview of BP changes in different ligation timepoints

| Ligation timepoints | 0 h       | 1 h       | 2 h       | 3 h       | 4 h       | 5 h       | 6 h      |
|---------------------|-----------|-----------|-----------|-----------|-----------|-----------|----------|
| Mean (Sham)         | 105.35    | 94.55     | 89.82     | 90.43     | 86.75     | 96.4      | 96.17    |
| Mean (AMI)          | 102.22    | 67.97     | 71.08     | 59.32     | 54.22     | 46.02     | 43.39    |
| SD (Sham)           | 6.05      | 8.41      | 5.46      | 8.20      | 7.54      | 6.28      | 11.75    |
| SD (AMI)            | 5.22      | 7.79      | 4.26      | 10.14     | 9.05      | 11.98     | 12.15    |
| Cohen's d           | 0.5539567 | 3.2790809 | 3.8269133 | 3.3737619 | 3.9054956 | 5.2674025 | 4.416118 |
| Power               | 0.1975046 | 0.9999997 | 1         | 0.9999988 | 1         | 1         | 1        |

Note: BP, blood pressure; Cohen's d is used to evaluate the effect size.

**Table S2.** Organ index of main visceral tissues (%)

| Organ index | Heart          | Liver         | Spleen           | Lung          | Kidney        |
|-------------|----------------|---------------|------------------|---------------|---------------|
| Sham        | 0.309 ± 0.003  | 3.897 ± 0.177 | 0.297 ± 0.033    | 0.439 ± 0.046 | 0.939 ± 0.173 |
| AMI         | 0.295 ± 0.020* | 3.889 ± 0.496 | 0.225 ± 0.034 ** | 0.510 ± 0.038 | 0.857 ± 0.042 |

Note: AMI, acute myocardial infarction; \* $p < 0.05$ ; \*\*  $p < 0.01$ .

**Table S3.** Validation reporting for miR-27a-5p-*Atg7* interaction

|   |                                                     |                                      |                                               |
|---|-----------------------------------------------------|--------------------------------------|-----------------------------------------------|
| 1 | miRNA                                               | Gene name                            | Mir27a                                        |
|   |                                                     | Entrez ID                            | 100314006                                     |
| 2 | Target gene                                         | Gene name                            | <i>Atg7</i>                                   |
|   |                                                     | Entrez ID                            | 312647                                        |
|   |                                                     | Transcript<br>(if available)         | <i>Atg7-201</i><br>(ENSRNOT00000067532.2)     |
|   |                                                     | Species                              | <i>Rattus norvegicus</i>                      |
| 3 | Species                                             | Species ID                           | 10116                                         |
|   |                                                     | Sequence of the target region, 5'-3' | GCCCT                                         |
| 4 | Experimental validation of miRNA–target interaction | Genomic location of MTI / 3'UTR      | 4:146776236-146776240 / 3'UTR: 25-29          |
|   |                                                     | Method for experimental validation   | luciferase reporter assay, qPCR, western blot |
|   |                                                     | Tissue, cell lines                   | heart; H9c2 cell lines                        |
| 5 | Sequence variant                                    | rs number (synonym)                  | na                                            |
| 6 | Associated disease or phenotype                     | As named in the reference            | Acute myocardial ischemia; hypoxia treatment  |
|   |                                                     | DOID (if available)                  | na                                            |
| 7 | Reference                                           | Author, year                         | na                                            |
|   |                                                     | PMID                                 | na                                            |

Note: na, not available.

**Table S4.** The specific primers used for qRT-PCR

| Gene name                       | Accession      | Sequence (5' to 3')                                                  |
|---------------------------------|----------------|----------------------------------------------------------------------|
| <i>rno-miR-27a-5p</i>           | MIMAT0004715   | F: AGGGCTTAGCTGCTTGTGAGCA<br>R: Uni-miR qPCR Primer, included in kit |
| <i>Caspase-3</i>                | NM_012922.2    | F: CATGGCCCTGAAATACGAAGTC<br>R: GCAGGCCTGAATGATGAAGAGTTT             |
| <i>P53</i>                      | NM_030989.3    | F: CTCCTCTCCCCAGCAAAAGA<br>R: GTAGACTGGCCCTTCTTGGT                   |
| <i>Faslg</i>                    | NM_012908.1    | F: GCCCGTGAATTACCCATGTC<br>R: TAGTGGTGATGGAGGTGGTG                   |
| <i>BAX</i>                      | NM_017059.2    | F: TGGCCTCCTTTCCTACTTCG<br>R: AAAATGCCTTTCCCCGTTC                    |
| <i>Bcl-2</i>                    | NM_016993.1    | F: GACGCGAAGTGCTATTGGT<br>R: TCAGGCTGGAAGGAGAAGAT                    |
| <i>Atg7</i>                     | NM_001012097.1 | F: GCTGGTCTCCTTGCTCAAAC<br>R: CAGGGTGCTGGGTTAGGTTA                   |
| <i>GAPDH</i>                    | NM_017008.4    | F: AACGACCCCTTCATTGACCTC<br>R: CCTTGACTGTGCCGTTGAACT                 |
| <i>U6</i>                       | ---            | F: CTCGCTTCGGCAGCACA<br>R: AACGCTTCACGAATTTGCGT                      |
| <i>rno-miR-27a-5p mimics</i>    |                | 5'-AGGGCUUAGCUGCUUGUGAGCA-3'<br>3'-UGCUCACAAGCAGCUAAGCCCU-5'         |
| <i>rno-miR-27a-5p inhibitor</i> |                | 5'-UCCCGAAUCGACGAACACUCGU-3'                                         |
| Negative control                |                | Universal sequences (Ribobio, Guangzhou, China)                      |

Note: *GAPDH* and *U6* were used as housekeeping genes to normalize mRNA and miRNA, respectively.

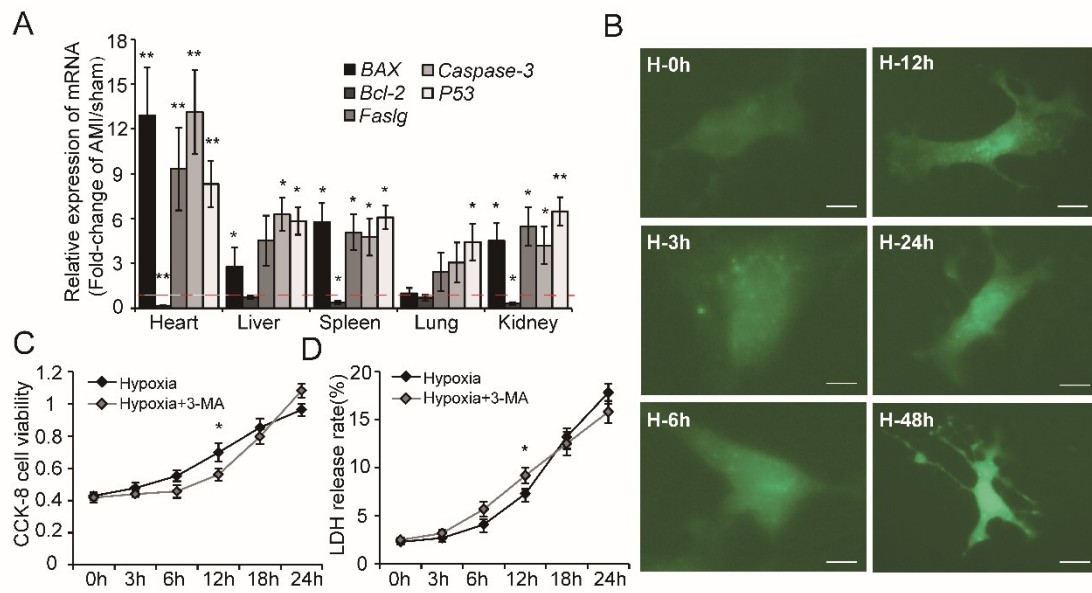

**Figure S1.** (A) The expression level of apoptosis-related gene in main visceral tissues were evaluated using qRT-PCR in in sham and AMI rats. (B) H9c2 cells were transfected GFP-LC3 plasmids and then exposed to hypoxia at different timepoints, fluorescent punctae were observed by a confocal fluorescence microscope; scale bar: 5 $\mu$ m. H9c2 cells were preincubated 3-MA (10 mM) for three hours and then exposed to hypoxia at different time. Cell viability (C) and membrane damage (D) were detected by CCK-8 assay and LDH release assays, respectively. Three independent experiments were performed in triplicate. Data are expressed as the mean  $\pm$  SD. \*  $p < 0.05$ , \*\*  $p < 0.01$ . H: hypoxia.
